# Supplementary material for: Carbon Quota Trading-Driven Low-Carbon Innovation in Manufacturing: Synergy and Pathway Optimization for Technology R&amp;D-Policy Incentive Coordination
Source: Research Square preprint supplement (doi:10.21203/rs.3.rs-7319125/v1), 2025-11-10
Supplement: Supplementary file 1 [file 89a5a07fa90f454be9b5ddc1.docx]

**Proposition 1:**
A sufficient condition for the existence of a steady-state Markov perfect Stackelberg equilibrium is that the initial value problem satisfies the following requirements:

There exists a unique, absolutely continuous solution ，and there exists a continuously differentiable and bounded function , for all , the Hamilton-Jacobi-Bellman (HJB) equation holds:

Since the manufacturer acts as the Stackelberg leader in the game, we employ backward induction to solve the problem. First, we maximize the term inside the square brackets in equation (3) to derive the retailer's optimal strategy:

By substituting Equation (4) into Equation (3), the manufacturer's optimal strategy can be similarly derived as follows:

Substituting Equations (4) and (5) into Equations (2) and (3) yields the Hamilton-Jacobi-Bellman (HJB) equation with respect to :

We conjecture that the solutions to Equations (6) and (7) admit the following functional form:

Where are constants. Substituting Equations (8) and (9) along with their partial derivatives into Equations (6) and (7), we obtain the following system of equations after simplification:

We obtain the following results:

Consequently, we derive the following solution:

By substituting the obtained parameters into Equations (4) and (5), we derive the feedback Stackelberg equilibrium strategies as follows:

Substituting Equations (12) and (14) into Equation (1) yields the following result:

Solving the first-order linear differential equation yields the equilibrium trajectory of green goodwill as follows:

where ​ represents the steady-state level of green goodwill. Q.E.D.

**Proposition 2 and Proposition 3**:
The proofs follow the same methodology as demonstrated for Proposition 1.
